# Supplementary material for: Application of Redox-Responsive Hydrogels Based on 2,2,6,6-Tetramethyl-1-Piperidinyloxy Methacrylate and Oligo(Ethyleneglycol) Methacrylate in Controlled Release and Catalysis
Source: MDPI journal article supplement (doi:10.3390/polym13081307), 2021-04-16
Supplement: s1 [file s1]

## Electronic Supplementary Information Section

### Application of redox-responsive hydrogels based on 2,2,6,6-tetramethyl-1-piperidinyloxy methacrylate and oligo(ethyleneglycol) methacrylate in controlled release and catalysis

Miriam Khodeir <sup>1</sup>, He Jia <sup>1</sup>, Alexandru Vlad<sup>1</sup> and Jean-François Gohy <sup>1,\*</sup>

<sup>1</sup> Institute of Condensed Matter and Nanosciences (IMCN), Bio- and Soft Matter (BSMA), Université catholique de Louvain, Place L. Pasteur 1, B-1348 Louvain-la-Neuve, Belgium

\* Correspondence: jean-francois.gohy@uclouvain.be

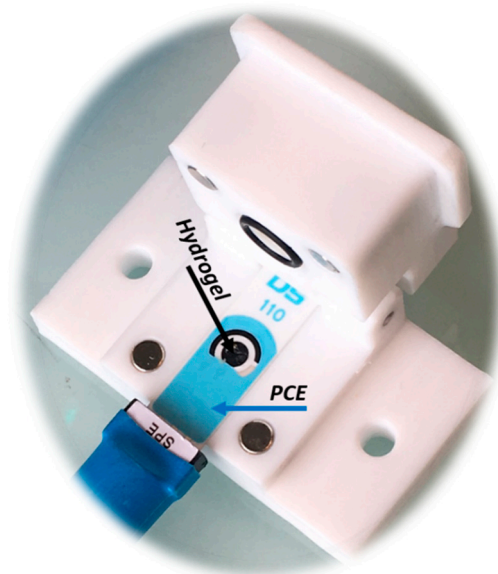

**Figure S1.** Experimental set-up for the electrochemical reduction of P(TEMPO<sup>+</sup>-*r*-OEGMA) hydrogels, swollen in aqueous NaClO<sub>4</sub> and loaded with aspirin using the printed carbon electrode method (PCE).

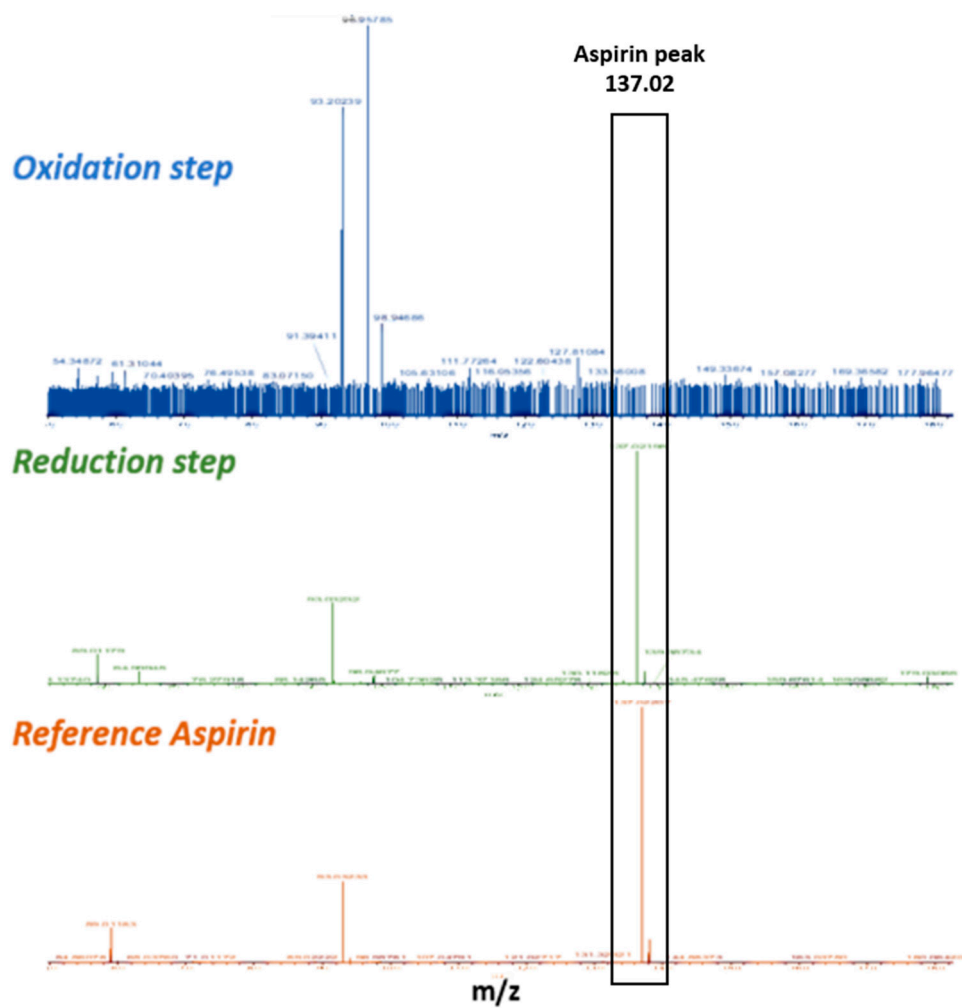

**Figure S2.** Mass spectroscopy analysis of the supernatant for the oxidation step (blue curve), reduction step (green curve) and the aspirin reference molecule (orange curve).

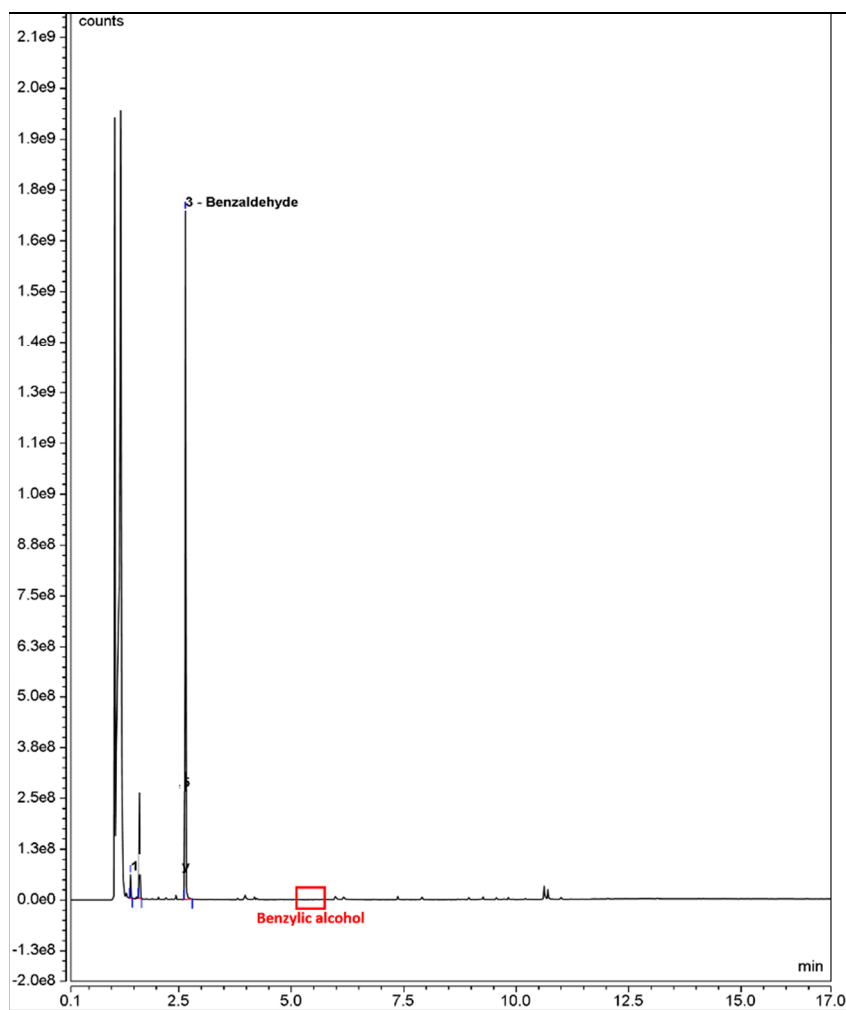

**Figure S3.** GC-MS spectrum of the solution obtained after oxidation of benzylic alcohol into benzaldehyde.
